# Supplementary material for: Catalytic synergy of WS2-anchored PdSe2 for highly sensitive hydrogen gas sensor
Source: Royal Society of Chemistry journal article supplement (doi:10.1039/d4nr00342j), 2024-01-01
Supplement: d4nr00342j1.pdf [file d4nr00342j1.pdf]

## **Catalytic synergy of WS<sub>2</sub> anchored PdSe<sub>2</sub> for highly sensitive hydrogen gas sensor**

Suresh Kumar<sup>a</sup>, Ashok Kumar<sup>b</sup>, Amit Kumar<sup>b</sup>, Atul G. Chakkar<sup>c</sup>, Atanu Betal<sup>a</sup>, Pradeep Kumar<sup>c</sup>, Satyajit Sahu<sup>a,\*</sup>, Mahesh Kumar<sup>b, d\*</sup>

<sup>a</sup>*Department of Physics, Indian Institute of Technology Jodhpur, Jodhpur 342030, India*

<sup>b</sup>*Department of Electrical Engineering, Indian Institute of Technology Jodhpur, Jodhpur 342030, India*

<sup>c</sup>*School of Physical Sciences, Indian Institute of Technology Mandi, Mandi 175005, India*

<sup>d</sup>*Department of Cybernetics, Nanotechnology and Data Processing, Faculty of Automatic Control, Electronics and Computer Science, Silesian University of Technology, Akademicka 16, 44-100 Gliwice, Poland*

\*Corresponding authors: Mahesh Kumar: [mkumar@iitj.ac.in](mailto:mkumar@iitj.ac.in), Satyajit Sahu: [satyajit@iitj.ac.in](mailto:satyajit@iitj.ac.in)

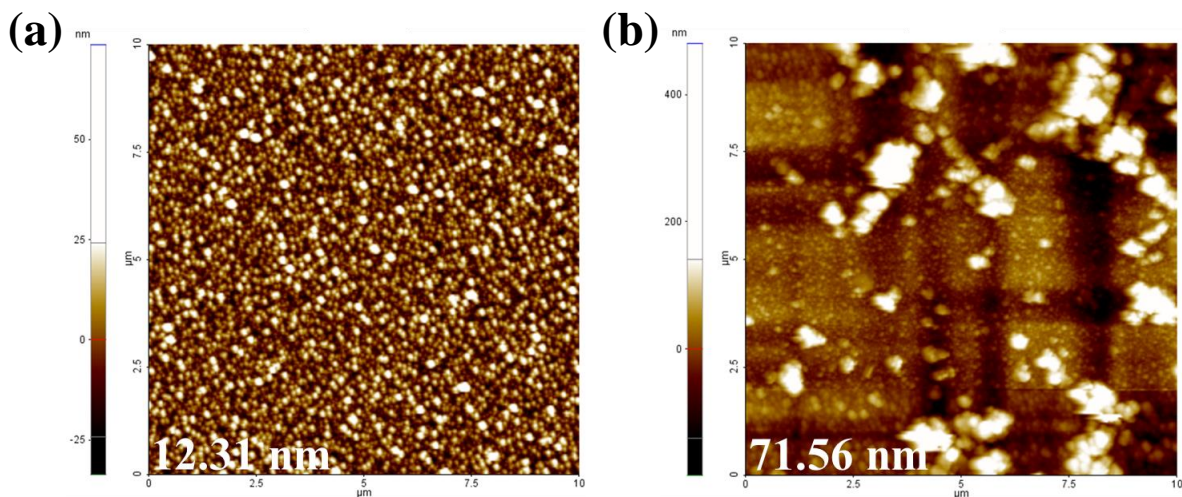

**Fig. S1** AFM images (a) pristine PdSe<sub>2</sub> and (b) WS<sub>2</sub> decorated PdSe<sub>2</sub> thin film

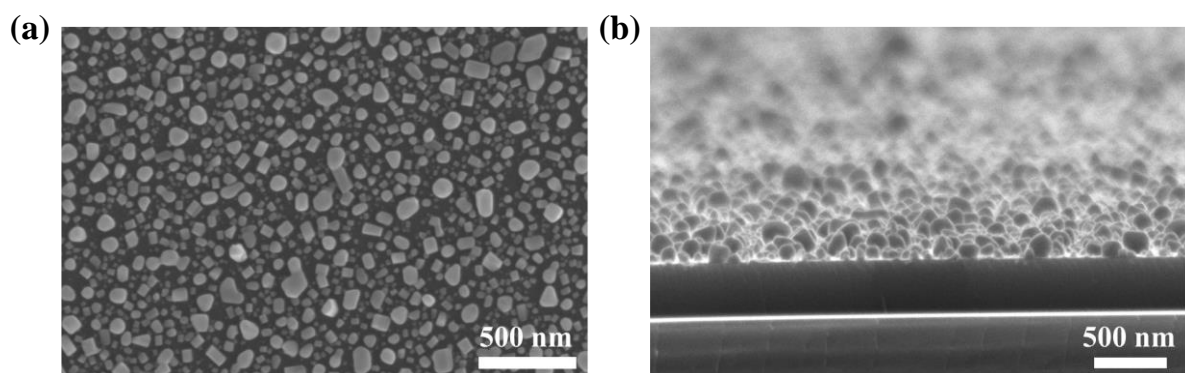

**Fig. S2** FE-SEM images (a) pristine PdSe<sub>2</sub> and (b) cross-sectional image of pristine PdSe<sub>2</sub>

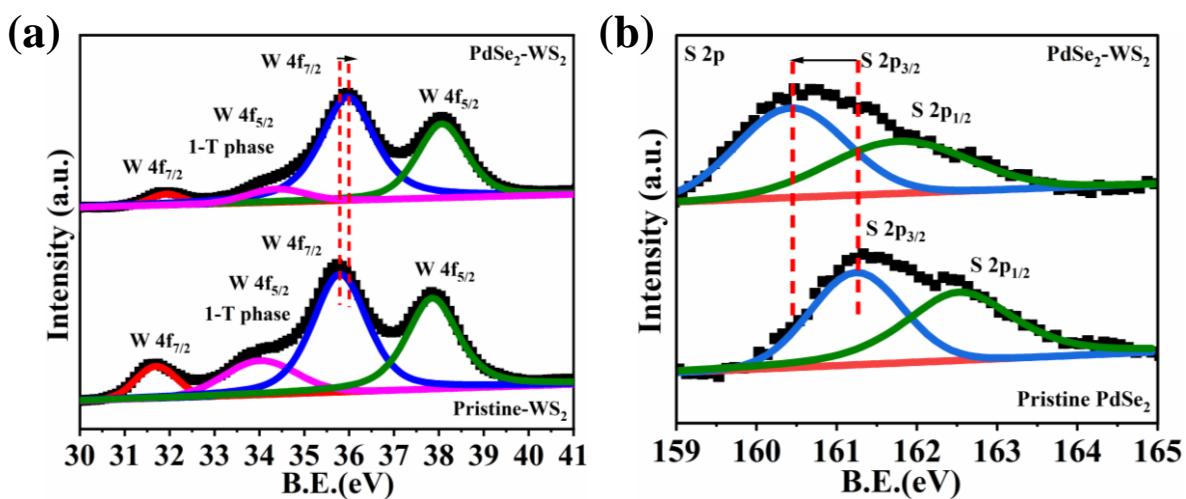

**Fig. S3** XPS core level spectra of (a) W 4f<sub>7/2</sub> and W 4f<sub>5/2</sub> (d) S 2p<sub>3/2</sub> and S 2p<sub>1/2</sub> of pristine WS<sub>2</sub> and WS<sub>2</sub> anchored PdSe<sub>2</sub>, respectively.

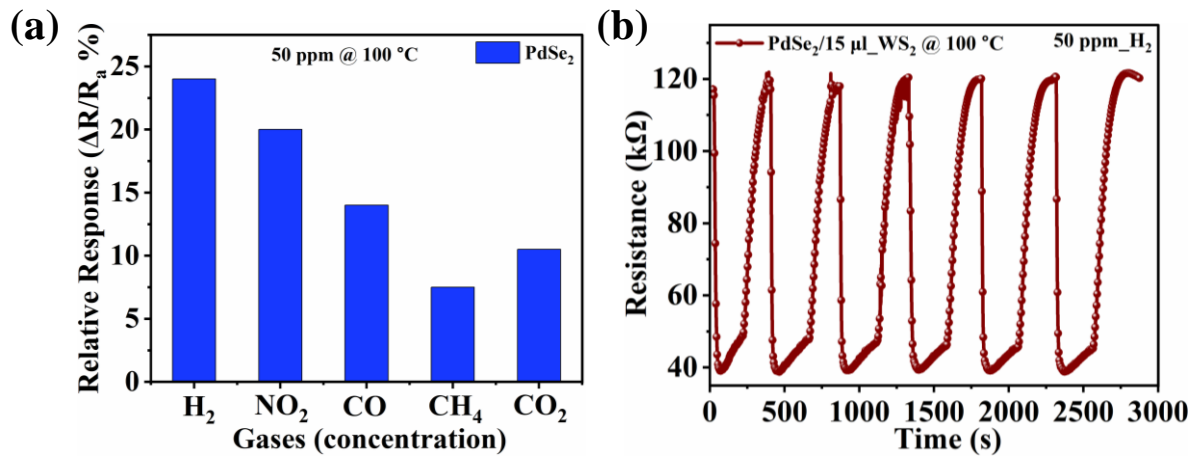

**Fig. S4** (a) selectivity of pristine PdSe<sub>2</sub> towards various gases (b) repeatability of PdSe<sub>2</sub>/WS<sub>2</sub> heterostructure.

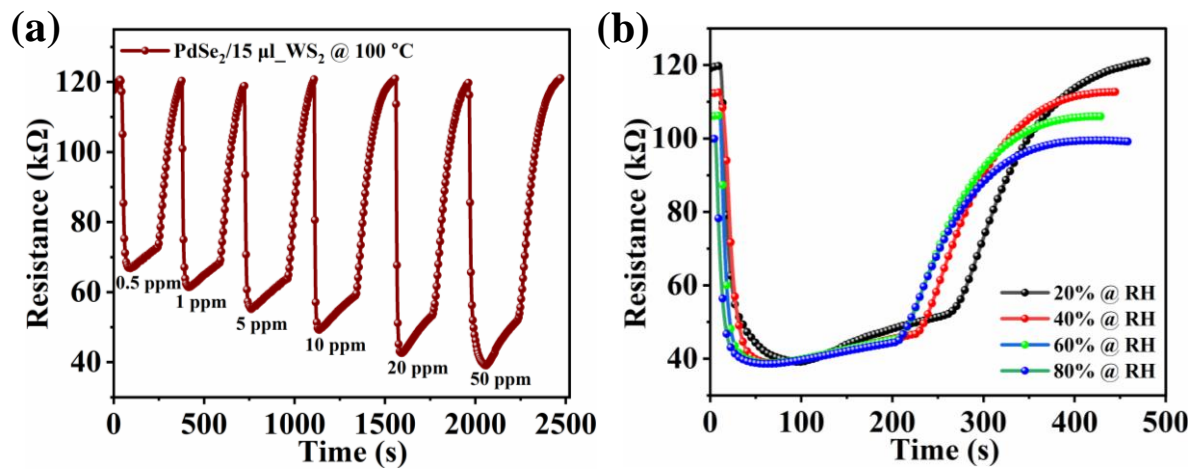

**Fig. S5** (a) Resistance of the 15  $\mu$ l WS<sub>2</sub> anchored PdSe<sub>2</sub> sensor at 100 °C from 0.5 to 50 ppm H<sub>2</sub> gas. (b) Resistance of the PdSe<sub>2</sub>/WS<sub>2</sub> heterostructure under different RH condition of 20%, 40%, 60% and 80% to 50 ppm H<sub>2</sub> at 100 °C.
